# Supplementary material
Source: HighWire-hosted journal article supplement (https://erj.ersjournals.com/content/58/5/2004656)
Supplement: inline-supplementary-material-1 [file inline-supplementary-material-1.pdf]

## **ONLINE SUPPLEMENT**

### **Title**

The coexistence of asthma and COPD: risk factors, clinical history and lung function trajectories

### **Authors**

Alessandro Marcon, Francesca Locatelli, Shyamali C Dharmage, Cecilie Svanes, Joachim Heinrich, Bénédicte Leynaert, Peter Burney, Angelo Corsico, Gulser Caliskan, Lucia Calciano, Thorarinn Gislason, Christer Janson, Deborah Jarvis, Rain Jõgi, Theodore Lytras, Andrei Malinovski, Nicole Probst-Hensch, Kjell Toren, Lidia Casas, Giuseppe Verlatto, Judith Garcia-Aymerich, and Simone Accordini, on behalf of the Ageing Lungs in European Cohorts (ALEC) study

## Appendix E1. Supplementary information on the European Community Respiratory Health Survey

*Co-ordinating center:* P. Burney, S. Chinn, C. Luczynska†, D. Jarvis, E. Lai (London).

Project management group: P. Burney (Project leader-UK), S. Chinn (UK), C. Luczynska† (UK), D. Jarvis (UK), P. Vermeire† (Antwerp), H. Kesteloot (Leuven), J. Bousquet (Montpellier), D. Nowak (Hamburg), J. Prichard† (Dublin), R. de Marco† (Verona), B. Rijcken (Groningen), J.M. Anto (Barcelona), J. Alves (Oporto), G. Boman (Uppsala), N. Nielsen (Copenhagen), P. Paoletti (Pisa).

*Steering Committee of ECRHS II:* U. Ackermann-Lieblich (University of Basel, Switzerland); N. Kuenzli (University of Basel, and University of Southern California, Los Angeles, USA); J.M. Antó and J. Sunyer (Institut Municipal d'Investigació Mèdica (IMIM-IMAS), Universitat Pompeu Fabra (UPF), Spain); P. Burney (project leader), S Chinn, D. Jarvis, J. Knox and C. Luczynska† (King's College London, UK); I. Cerveri (University of Pavia, Italy); R. de Marco† (University of Verona, Italy); T. Gislason (Iceland University Hospital, Iceland); J. Heinrich and M. Wjst (GSF–Institute of Epidemiology, Germany); C. Janson (Uppsala University, Sweden); B. Leynaert and F. Neukirch (Institut National de la Santé et de la Recherche Médicale (INSERM), France); J. Schouten (University of Groningen, The Netherlands); C. Svanes (University of Bergen, Norway); P. Vermeire† (University of Antwerp, Belgium).

*Principal investigators and senior scientific teams of ECRHS II:* Australia: (M. Abramson, E.H Walters, J. Raven); Belgium: South Antwerp and Antwerp City (P. Vermeire†, J. Weyler, M. van Sprundel, V. Nelen); Estonia: Tartu (R. Jõgi, A. Soon); France: Paris (F. Neukirch, B. Leynaert, R. Liard, M. Zureik), Grenoble (I. Pin, J. Ferran-Quentin); Bordeaux (A. Taytard, C. Raheison), Montpellier (J. Bousquet, P.J. Bousquet); Germany: Erfurt (J. Heinrich, M. Wjst, C. Frye, I. Meyer); Iceland: Reykjavik (T. Gislason, E. Bjornsson, D. Gislason, K.B. Jörundsdóttir); Italy: Turin (R. Bono, M. Bugiani, P. Piccioni, E. Caria, A. Carosso, E. Migliore, G. Castiglioni), Verona (R. de Marco†, G. Verlato, E. Zanolin, S. Accordini, A. Poli, V. Lo Cascio, M. Ferrari, I. Cazzoletti), Pavia (A. Marinoni, S. Villani, M. Ponzio, F. Frigerio, M. Comelli, M. Grassi, I. Cerveri, A. Corsico); The Netherlands: Groningen and Geleen (J. Schouten, M. Kerkhof); Norway: Bergen (A. Gulsvik, E. Omenaas, C. Svanes, B. Laerum); Spain: Albacete (J. Martinez-Moratalla Rovira, E. Almar, M. Arévalo, C. Boix, G. González, J.M. Ignacio García, J. Solera, J. Damián, Galdakao (N. Muñozguren, J. Ramos, I. Urrutia, U. Aguirre), Barcelona (J.M. Antó, J. Sunyer, M. Kogevinas, J.P. Zock, X. Basagaña, A. Jaen, F. Burgos, C. Acosta, Huelva (J. Maldonado, A. Pereira, J.L. Sanchez), Oviedo (F. Payo, I. Huerta, A. de la Vega, L. Palenciano, J. Azofra, A. Cañada); Sweden: Göteborg (K. Toren, L. Lillienberg, A.C. Olin, B. Balder, A. Pfeifer-Nilsson, R. Sundberg), Umea (E. Norrman, M. Soderberg, K.A. Franklin, B. Lundback, B. Forsberg, L. Nystrom), Uppsala (C. Janson, G. Boman, D. Norback, G. Wieslander, M. Gunnbjornsdottir); Switzerland: Basel (N. Küenzli, B. Dibbert, M. Hazenkamp, M. Brutsche, U. Ackermann-Lieblich); United Kingdom: Ipswich (D. Jarvis, R. Hall, D. Seaton), Norwich (D. Jarvis, B. Harrison).

*Principal Investigators and senior scientific teams of ECRHS III:* Australia: Melbourne (M. Abramson, G. Benke, S. Dharmage, B. Thompson, S. Kaushik, M. Matheson); Belgium: South Antwerp & Antwerp City (J. Weyler, H. Bentouhami, V. Nelen); Denmark: Aarhus (V. Schlunssen, T. Sigsgaard, R. Dahl); Estonia: Tartu (R. Jõgi, H. Orru); France: Bordeaux (C. Raheison, P.O. Girodet), Grenoble (I. Pin, V. Siroux, J. Ferran, J.L. Cracowski), Montpellier (P. Demoly, A. Bourdin, I. Vachier), Paris (B. Leynaert, D. Soussan, D. Courbon, C. Neukirch, L. Alavoine, X. Duval, I. Poirier); Germany: Erfurt (J. Heinrich, E. Becker, G. Woelke, O. Manuwald), Hamburg (H. Magnussen, D. Nowak, A.M. Kirsten); Iceland: Reykjavik (T. Gislason, B. Benediksdottir, D. Gislason, E.S. Arnardottir, M. Clausen, G. Gudmundsson, L. Gudmundsdottir, H. Palsdottir, K. Olafsdottir, S. Sigmundsdottir, K. Bara-Jörundsdottir); Italy: Pavia (I. Cerveri, A. Corsico, A. Grosso, F. Albicini, E. Gini, E.M. Di Vincenzo, V. Ronzoni, S. Villani, F. Campanella, M. Gnesi, F. Manzoni, L. Rossi, O. Ferraro), Turin: (M. Bugiani, R. Bono, P. Piccioni, R. Tassinari, V. Bellisario, G. Trucco), Verona: (R. de Marco†, S. Accordini, L. Calciano, L. Cazzoletti, M. Ferrari, A.M. Fratta Pasini, F. Locatelli, P. Marchetti, A. Marcon, E. Montoli, G. Nguyen, M. Olivieri, C. Papadopoulou, C. Posenato, G. Pesce, P. Vallerio, G. Verlato, E. Zanolin); Netherlands: Groningen (H.M. Boezen); Norway: (C. Svanes, E. Omenaas, A. Johannessen, T. Skorge, F. Gomez Real); Spain: Albacete (J. Martinez-Moratalla Rovira, E. Almar, A. Mateos, S. García, A. Núñez, P. López, R. Sánchez, E. Mancebo), Barcelona: (J.M. Antó, J.P. Zock, J. Garcia-Aymerich, M. Kogevinas, X. Basagaña, A.E. Carsin, F. Burgos, C. Sanjuas, S. Guerra, B. Jacquemin, P. Davdand); Galdakao (N. Muñozguren, I. Urrutia, U. Aguirre, S. Pascual); Huelva (J. Antonio Maldonado, A. Pereira, J. Luis Sánchez, L. Palacios); Oviedo (F. Payo, I.

Huerta, N. Sánchez, M. Fernández, B. Robles); Sweden: Göteborg (K. Torén, M. Holm, J.L. Kim, A.C. Olin, A. Dahlman-Högglund), Umea (B. Forsberg, L. Braback, L. Modig, B. Järvholm, H. Bertilsson, K.A. Franklin, C. Wahlgreen), Uppsala:(B. Andersson, D. Norback, U. Spetz Nystrom, G. Wieslander, G.M. Bodinaa Lund, K Nisser); Switzerland: Basel (N.M. Probst-Hensch, N. Künzli, D. Stolz, C. Schindler, T. Rochat, J.M. Gaspoz, E. Zemp Stutz, M. Adam, C. Autenrieth, I. Curjuric, J. Dratva, A. Di Pasquale, R. Ducret-Stich, E. Fischer, L. Grize, A. Hensel, D. Keidel, A. Kumar, M. Imboden, N. Maire, A. Mehta, H. Phuleria, M. Ragettli, M. Ritter, E. Schaffner, G.A. Thun, A. Ineichen, T. Schikowski, M. Tarantino, M. Tsai); UK: London (P. Burney, D. Jarvis, S. Kapur, R. Newson, J. Potts), Ipswich (N. Innes), Norwich (A. Wilson).

*Financial support for ECRHS I:* The co-ordination of this work was supported by the European Commission and the authors and participants are grateful to the late C. Baya and M. Hallen for their help during the study and K. Vuylsteek and the members of the COMAC for their support. The following grants helped to fund the local studies: Australia: Asthma Foundation of Victoria, Allen and Hanbury's; Belgium: Belgian Science Policy Office, National Fund for Scientific Research; Estonia: Estonian Science Foundation, grant no 1088; France: Ministère de la Santé, Glaxo France, Institut Pneumologique d'Aquitaine, Contrat de Plan Etat-Région Languedoc-Rousillon, CNMATS, CNMRT (90MR/10, 91AF/6), Ministre délégué de la santé, RNSP, France, GSF; Germany: Bundesminister für Forschung und Technologie; Italy: Ministero dell'Università e della Ricerca Scientifica e Tecnologica, CNR, Regione Veneto grant RSF n. 381/05.93; Norway: Norwegian Research Council project no. 101422/310; Portugal: Glaxo Farmacêutica Lda, Sandoz Portuguesa; Spain: Fondo de Investigación Sanitaria (#91/0016-060-05/E, 92/0319 and #93/0393), Hospital General de Albacete, Hospital General Juan Ramón Jiménez, Dirección Regional de Salud Pública (Consejería de Sanidad del Principado de Asturias), CIRIT (1997 SGR 00079) and Servicio Andaluz de Salud; Sweden: The Swedish Medical Research Council, the Swedish Heart Lung Foundation, the Swedish Association against Asthma and Allergy; Switzerland: Swiss National Science Foundation grant 4026-28099; UK: National Asthma Campaign, British Lung Foundation, Department of Health, South Thames Regional Health Authority.

*Financial Support for ECRHS II:* Australia: National Health and Medical Research Council; Belgium: Antwerp: Fund for Scientific Research (grant code, G.0402.00), University of Antwerp, Flemish Health Ministry; Estonia: Tartu Estonian Science Foundation grant no 4350, France: (All) Programme Hospitalier de Recherche Clinique—Direction de la Recherche Clinique (DRC) de Grenoble 2000 number 2610, Ministry of Health, Ministère de l'Emploi et de la Solidarité, Direction Générale de la Santé, Centre Hospitalier Universitaire (CHU) de Grenoble; Bordeaux: Institut Pneumologique d'Aquitaine; Grenoble: Comité des Maladies Respiratoires de l'Isère Montpellier: Aventis (France), Direction Regionale des Affaires Sanitaires et Sociales Languedoc-Roussillon; Paris: Union Chimique Belge-Pharma (France), Aventis (France), Glaxo France, Germany: Erfurt: GSF—National Research Centre for Environment and Health, Deutsche Forschungsgemeinschaft (grant code, FR1526/1-1); Hamburg: GSF—National Research Centre for Environment and Health, Deutsche Forschungsgemeinschaft (grant code, MA 711/4-1); Iceland: Reykjavik, Icelandic Research Council, Icelandic University Hospital Fund; Italy: Pavia: GlaxoSmithKline Italy, Italian Ministry of University and Scientific and Technological Research (MURST), Local University Funding for Research 1998 and 1999; Turin: Azienda Sanitaria Locale 4 Regione Piemonte (Italy), Azienda Ospedaliera Centro Traumatologico Ospedaliero/Centro Traumatologico Ortopedico—Istituto Clinico Ortopedico Regina Maria Adelaide Regione Piemonte; Verona: Ministero dell'Università e della Ricerca Scientifica (MURST), Glaxo Wellcome s.p.a.; Norway: Bergen: Norwegian Research Council, Norwegian Asthma and Allergy Association, Glaxo Wellcome AS, Norway Research Fund; Spain: Fondo de Investigación Sanitarias (grant codes, 97/0035-01, 99/0034-01 and 99/0034-02), Hospital Universitario de Albacete, Consejería de Sanidad; Barcelona: Sociedad Española de Neumología y Cirugía Torácica, Public Health Service (grant code, R01 HL62633-01), Fondo de Investigaciones Sanitarias (grant codes, 97/0035-01, 99/0034-01, and 99/0034-02), Consell Interdepartamental de Recerca i Innovació Tecnològica (grant code, 1999SGR 00241) Instituto de Salud Carlos III; Red de Centros de Epidemiología y Salud Pública, C03/09, Red de Bases moleculares y fisiológicas de las Enfermedades Respiratorias, C03/011 and Red de Grupos Infancia y Medio Ambiente G03/176; Huelva: Fondo de Investigaciones Sanitarias (grant codes, 97/0035-01, 99/0034-01, and 99/0034-02); Galdakao: Basque Health Department; Oviedo: Fondo de Investigaciones Sanitaria (97/0035-02, 97/0035, 99/0034-01, 99/0034-02, 99/0034-04, 99/0034-06, 99/350, 99/0034--07), European Commission (EU-PEAL PL01237), Generalitat de Catalunya (CIRIT 1999 SGR 00214), Hospital Universitario de Albacete, Sociedad Española de Neumología y Cirugía Torácica (SEPAR R01 HL62633-01) Red de Centros de Epidemiología y Salud Pública (C03/09), Red de Bases moleculares y fisiológicas de las Enfermedades Respiratorias (C03/011) and Red de Grupos Infancia y Medio Ambiente (G03/176; 97/0035-01, 99/0034-01, and 99/0034-02); Sweden: Göteborg, Umea, Uppsala: Swedish Heart Lung

Foundation, Swedish Foundation for Health Care Sciences and Allergy Research, Swedish Asthma and Allergy Foundation, Swedish Cancer and Allergy Foundation, Swedish Council for Working Life and Social Research (FAS); Switzerland: Basel Swiss National Science Foundation, Swiss Federal Office for Education and Science, Swiss National Accident Insurance Fund; UK: Ipswich and Norwich: Asthma UK (formerly known as National Asthma Campaign).

*Financial Support for ECRHS III:* Australia: National Health and Medical Research Council; Belgium: Antwerp South and Antwerp City: Research Foundation Flanders (FWO), grant code G.0.410.08.N.10; Estonia: Tartu: SF0180060s09 from the Estonian Ministry of Education; France: (All) Ministère de la Santé, Programme Hospitalier de Recherche Clinique (PHRC) national 2010, Bordeaux: INSERM U897 Université Bordeaux segalen, Grenoble: Comité Scientifique AGIRadom 2011, Paris: Agence Nationale de la Santé, Région Ile de France, domaine d'intérêt majeur (DIM); Germany: Erfurt: German Research Foundation HE 3294/10-1, Hamburg: German Research Foundation MA 711/6-1, NO 262/7-1; Iceland: Reykjavik: The Landspítali University Hospital Research Fund, University of Iceland Research Fund, ResMed Foundation, California, USA, Orkuveita Reykjavíkur (Geothermal plant), Vegagerðin (The Icelandic Road Administration (ICERA)); Italy: All Italian centers were funded by the Italian Ministry of Health, Chiesi Farmaceutici SpA, in addition Verona was funded by Cariverona foundation, Education Ministry (MIUR); Norway: Norwegian Research council grant no 214123, Western Norway Regional Health Authorities grant no 911631, Bergen Medical Research Foundation; Spain: Fondo de Investigación Sanitaria (PS09/02457, PS09/00716, PS09/01511, PS09/02185, PS09/03190), Servicio Andaluz de Salud, Sociedad Española de Neumología y Cirugía Torácica (SEPAR 1001/2010), Fondo de Investigación Sanitaria (PS09/02457), Barcelona: Fondo de Investigación Sanitaria (FIS PS09/00716), Galdakao: Fondo de Investigación Sanitaria (FIS 09/01511), Huelva: Fondo de Investigación Sanitaria (FIS PS09/02185) and Servicio Andaluz de Salud, Oviedo: Fondo de Investigación Sanitaria (FIS PS09/03190); Sweden: All centers were funded by The Swedish Heart and Lung Foundation, The Swedish Asthma and Allergy Association, The Swedish Association against Lung and Heart Disease, Swedish Research Council for health, working life and welfare (FORTE), Göteborg: also received further funding from the Swedish Council for Working life and Social Research. Umeå: also received funding from Vasterbotten Country Council ALF grant; Switzerland: The Swiss National Science Foundation (grants no 33CSCO-134276/1, 33CSCO-108796, 3247BO-104283, 3247BO-104288, 3247BO-104284, 3247-065896, 3100-059302, 3200-052720, 3200-042532, 4026-028099), The Federal office for forest, environment and landscape, The Federal Office of Public Health, The Federal Office of Roads and Transport, the canton's government of Aargau, Basel-Stadt, Basel-Land, Geneva, Luzern, Ticino, Valais and Zürich, the Swiss Lung League, the canton's Lung League of Basel Stadt/ Basel, Landschaft, Geneva, Ticino, Valais and Zurich, SUVA, Freiwillige Akademische Gesellschaft, UBS Wealth Foundation, Talecris Biotherapeutics GmbH, Abbott Diagnostics, European Commission 018996 (GABRIEL), Wellcome Trust WT 084703MA; UK: Medical Research Council (Grant Number 92091), support also provided by the National Institute for Health Research through the Primary Care Research Network.

## Appendix E2. Additional methods and results

### Clinical measurements

At each of the three examinations (ECRHS I, II and III), height and weight were measured and body mass index was calculated ( $\text{kg/m}^2$ ). Subjects were advised to avoid using a  $\beta_2$ -agonist or anticholinergic inhaler for 4 h and oral medication ( $\beta_2$ -agonist, theophylline or antimuscarinic) for 8 h before the clinical tests. Time since the most recent use of long-acting  $\beta_2$ -agonists was recorded; lung function measurements from subjects who had used long-acting  $\beta_2$ -agonists within the previous 12 hours were excluded ( $n=26$  observations), to minimise bias from short-term bronchodilation effects. Biomedin or SensorMedics spirometers were used in most centres at ECRHS I and II, whereas NDD EasyOne was used in all centres at ECRHS III, see supplementary Table E1 of Marcon et al. 2018 (1).

### Exposures to occupational agents

At ECRHS II and III, participants provided a detailed list of their previous and present occupations. Exposures were assessed by linking the International Classification of Occupations 88 codes of each employment to the ALOHA(+) Job Exposure Matrix, which assigns three levels of exposure (none, low, high) to 10 categories of agents. The weighted total duration of exposed jobs during the period was calculated using weights of 1 and 4 for low-exposure and high-exposure jobs, respectively (2). For the purpose of disease classification,  $\geq 5$  years low-intensity exposures (or equivalent high-intensity exposures) to occupational agents were considered as one of the criteria for COPD or asthma+COPD.

### Disease definitions based on the GOLD fixed cut-off criterion

For sensitivity analysis, we also applied disease definitions based on the GOLD fixed cut-off criterion of persistent airflow obstruction ( $\text{FEV}_1/\text{FVC} < 0.70$ ) (3), which replaced the LLN cut-off ( $\text{FEV}_1/\text{FVC} < \text{LLN}$ ), and replicated the main analysis. We assigned subjects to 5 mutually exclusive groups at the last examination (ECRHS III). All the criteria composing disease definitions were fulfilled at the time of ECRHS III on the basis of data measured at ECRHS III (lung function data, symptoms) or cumulative/past data (history of exposures, history of asthma, early-life respiratory infections). Disease groups were:

- 1) **Asthma+COPD** ( $n=247$ ): postbronchodilator  $\text{FEV}_1/\text{FVC} < 0.70$  + at least one GOLD-defined indicator for COPD (lifetime history of exposures, key symptoms, and/or early life risk factors) + *either* lifetime asthma history *or* marked BDR (increase in  $\text{FEV}_1 > 12\%$  and  $> 400\text{mL}$ )
- 2) **COPD alone** ( $n=208$ ): postbronchodilator  $\text{FEV}_1/\text{FVC} < 0.70$  + at least one GOLD-defined indicator for COPD + *neither* lifetime asthma history *nor* marked BDR
- 3) **Current asthma alone** ( $n=750$ ): lifetime asthma history + one among: asthma-like symptoms, asthma attacks, use of inhaled/oral respiratory medicines in the last 12 months (with or without postbronchodilator  $\text{FEV}_1/\text{FVC} < 0.70$ )
- 4) **Past asthma alone** ( $n=253$ ): lifetime asthma history but no symptoms, attacks, or medication (with or without postbronchodilator  $\text{FEV}_1/\text{FVC} < 0.70$ )
- 5) **Reference subjects** ( $n=3360$ ): none of the aforementioned conditions and postbronchodilator  $\text{FEV}_1/\text{FVC} \geq 0.70$ .

## Results of the sensitivity analyses

Lung function trajectories were similar when considering only the subjects with three measurements available (**Figure E4**), as well as when excluding the subjects with a spirometric pattern compatible with PRISm (**Figure E5**), who were 3.8, 9.9, and 5.2% of the past asthma alone, current asthma alone and reference groups, respectively.

The results were also consistent when using disease definitions based on the GOLD criterion of obstruction (**Figures E6-E7**). However, the subjects with COPD alone were older on average (57.5 years) (**Table E7**), less likely to have smoked  $\geq 10$  pack-years, and the difference in the proportion reporting childhood respiratory infections between asthma+COPD and COPD alone became wider (22.6 and 13.4%, respectively) compared to the main analysis (19.1 and 14.0%, respectively) (**Table E8**).

**Table E1**

Definitions of additional covariates.

| Covariate                                  | Definition (Q = questionnaire item)                                                                                                                                                                                                                                                                                                                                                                                                                                                                                                                                    | Source of information |
|--------------------------------------------|------------------------------------------------------------------------------------------------------------------------------------------------------------------------------------------------------------------------------------------------------------------------------------------------------------------------------------------------------------------------------------------------------------------------------------------------------------------------------------------------------------------------------------------------------------------------|-----------------------|
| Low education                              | Q32 Are you a full time student?<br>Q32.1 At what age did you complete full time education?                                                                                                                                                                                                                                                                                                                                                                                                                                                                            | ECRHS I <sup>a</sup>  |
| Physical activity                          | Exercising with a frequency of two or more times a week ('2–3 times a week' or greater) and with a duration of about 1 hour a week or more (4), based on:<br>Q40 How often do you usually exercise so much that you get out of breath or sweat?<br>Q41 How many hours a week do you usually exercise so much that you get out of breath or sweat?                                                                                                                                                                                                                      | ECRHS III             |
| Age at asthma onset                        | Q13 Have you ever had asthma?<br>Q13.2 How old were you when you had your first attack of asthma?                                                                                                                                                                                                                                                                                                                                                                                                                                                                      | ECRHS I <sup>a</sup>  |
| Asthma-like symptoms, last 12 months       | Q1 Have you had wheezing or whistling in your chest at any time in the last 12 months?<br>Q2 Have you woken up with a feeling of tightness in your chest at any time in the last 12 months?<br>Q3 Have you had an attack of shortness of breath that came on during the day when you were at rest at any time in the last 12 months?<br>Q4 Have you had an attack of shortness of breath that came on following strenuous activity at any time in the last 12 months?<br>Q5 Have you been woken by an attack of shortness of breath at any time in the last 12 months? | ECRHS III             |
| Chronic cough                              | Q9 Do you usually cough during the day, or at night, in the winter?<br>Q9.1 Do you cough like this on most days for as much as three months each year?                                                                                                                                                                                                                                                                                                                                                                                                                 | ECRHS III             |
| Chronic sputum production                  | Q11 Do you usually bring up any phlegm from your chest during the day, or at night, in the winter?<br>Q11.1 Do you bring up phlegm like this on most days for as much as three months each year?                                                                                                                                                                                                                                                                                                                                                                       | ECRHS III             |
| Medical Research Council dyspnoea score >1 | Answer NO to:<br>Q14 Are you disabled from walking by a condition other than heart or lung disease?                                                                                                                                                                                                                                                                                                                                                                                                                                                                    | ECRHS III             |

|                                                                                |                                                                                                                                                                                                                                                                                                                                                                                                                                                       |                  |
|--------------------------------------------------------------------------------|-------------------------------------------------------------------------------------------------------------------------------------------------------------------------------------------------------------------------------------------------------------------------------------------------------------------------------------------------------------------------------------------------------------------------------------------------------|------------------|
|                                                                                | + Answer YES to:<br>Q14.1 Are you troubled by shortness of breath when hurrying on level ground or walking up a slight hill?                                                                                                                                                                                                                                                                                                                          |                  |
| Hay fever                                                                      | Q20 Do you have any nasal allergies, including hay fever?                                                                                                                                                                                                                                                                                                                                                                                             | ECRHS III        |
| Eczema, ever                                                                   | Q28 Have you ever had eczema or any kind of skin allergy?                                                                                                                                                                                                                                                                                                                                                                                             | ECRHS III        |
| Cat owner                                                                      | Q64 Do you keep a cat?                                                                                                                                                                                                                                                                                                                                                                                                                                | ECRHS III        |
| Dog owner                                                                      | Q65 Do you keep a dog?                                                                                                                                                                                                                                                                                                                                                                                                                                | ECRHS III        |
| Mould in the house, ever                                                       | Q56 Has there ever been any mould or mildew on any surface, other than food, inside the home?                                                                                                                                                                                                                                                                                                                                                         | ECRHS III        |
| Mould in the house, last 12 months                                             | Answer YES to both:<br>Q56 Has there ever been any mould or mildew on any surface, other than food, inside the home?<br>Q56.1 Has there ever been any mould or mildew on any surface inside the home in the last 12 months?                                                                                                                                                                                                                           | ECRHS III        |
| Respiratory infections in childhood                                            | Q31 Did you have a serious respiratory infection before the age of five years?                                                                                                                                                                                                                                                                                                                                                                        | ECRHS I          |
| Maternal smoking in childhood                                                  | Q19 Did your mother ever smoke regularly during your childhood, or before you were born?                                                                                                                                                                                                                                                                                                                                                              | ECRHS I          |
| Cat in childhood<br>Dog in childhood                                           | When you were a child did anyone in your household keep any of the following pets?<br>Q51.1 cats<br>Q51.2 dogs                                                                                                                                                                                                                                                                                                                                        | ECRHS I          |
| Parental asthma                                                                | Having one or both parents with asthma, based on:<br>Q25 Did your mother ever have asthma?<br>Q27 Did your father ever have asthma?                                                                                                                                                                                                                                                                                                                   | ECRHS I          |
| Parental COPD                                                                  | Did your biological parents ever suffer from chronic bronchitis, emphysema and/or COPD?<br>Q35.2.1 Mother<br>Q35.2.2 Father                                                                                                                                                                                                                                                                                                                           | ECRHS III        |
| History of heavy smoking                                                       | Having smoked $\geq 10$ pack-years over lifetime (5)                                                                                                                                                                                                                                                                                                                                                                                                  | ECRHS III        |
| History of occupational exposures                                              | $\geq 5$ years of low-intensity or equivalent exposure to occupational agents (2)                                                                                                                                                                                                                                                                                                                                                                     | ECRHS II and III |
| Use of respiratory medication, last 12 months                                  | Q78 Have you used any inhaled medicines to help your breathing at any time in the last 12 months?<br>Q79 Have you used any pills, capsules, tablets or medicines, other than inhaled medicines, to help your breathing at any time in the last 12 months?                                                                                                                                                                                             | ECRHS III        |
| Preserved ratio impaired spirometry (PRISm)                                    | Postbronchodilator FEV <sub>1</sub> /FVC >LLN in combination with postbronchodilator FEV <sub>1</sub> <LLN or postbronchodilator FVC <LLN                                                                                                                                                                                                                                                                                                             | ECRHS III        |
| Emergency Room/hospital admission for breathing problems since the last survey | Answer YES to both:<br>Q93 Since the last survey, have you visited a hospital casualty department or emergency room (for any reason, apart from accidents and injuries)?<br>Q93.1 Was this due at least once to breathing problems?<br>AND/OR<br>Answer YES to both:<br>Q94 Since the last survey, have you spent a night in hospital (for any reason, apart from accidents and injuries)?<br>Q94.1 Was this due at least once to breathing problems? | ECRHS III        |
| Heart disease                                                                  | Q91.2.1 Do you have or have you ever had any of the following illnesses: Angina, heart attack, coronary heart disease?                                                                                                                                                                                                                                                                                                                                | ECRHS III        |

<sup>a</sup> data from ECRHS II and/or III were also used when information from ECRHS I was missing

**Table E2**

Definition of medical examinations (having being seen by a general practitioner or specialist at least once) in the last 12 months at ECRHS I, II, and III.

| <b>ECRHS I</b>                                                                                                                                                                                                                                                                                                                                                                                                                                                                                                                                                                                  | <b>ECRHS II</b>                                                                                                                                                                                                                                                                                                                                                                                                                                                                                                                                                                                                                                                | <b>ECRHS III</b>                                                                                                                                                                                                                                                                                                                                                                                                                                                                                                                                                                                                                                                                                                                                                |
|-------------------------------------------------------------------------------------------------------------------------------------------------------------------------------------------------------------------------------------------------------------------------------------------------------------------------------------------------------------------------------------------------------------------------------------------------------------------------------------------------------------------------------------------------------------------------------------------------|----------------------------------------------------------------------------------------------------------------------------------------------------------------------------------------------------------------------------------------------------------------------------------------------------------------------------------------------------------------------------------------------------------------------------------------------------------------------------------------------------------------------------------------------------------------------------------------------------------------------------------------------------------------|-----------------------------------------------------------------------------------------------------------------------------------------------------------------------------------------------------------------------------------------------------------------------------------------------------------------------------------------------------------------------------------------------------------------------------------------------------------------------------------------------------------------------------------------------------------------------------------------------------------------------------------------------------------------------------------------------------------------------------------------------------------------|
| <p><b>Answer YES to Q71</b><br/>Have you ever been seen by a doctor because of breathing problems or because of shortness of breath?</p> <p style="text-align: center;">+</p> <p><b>Options 1, 2 or 3 of Q71.1</b><br/>When was the last time you were seen by a doctor because of breathing problems or because of shortness of breath?</p> <ol style="list-style-type: none"><li>1) within the last seven days</li><li>2) more than seven days ago but within the last four weeks</li><li>3) more than four weeks ago but within the last 12 months</li><li>4) more than a year ago</li></ol> | <p><b>Answer YES to Q86</b><br/>Since the last survey have you been seen by a doctor because of breathing problems or because of shortness of breath?</p> <p style="text-align: center;">+ <i>one among:</i></p> <p><b>Answer YES to Q86.1</b><br/>Have you been seen by a general practitioner because of breathing problems or shortness of breath in the last 12 months?</p> <p style="text-align: center;"><i>or</i></p> <p><b>Answer YES to Q86.4</b><br/>Have you seen a specialist (chest physician, allergy specialist, internal medicine specialist, ENT doctor) because of your breathing problems or shortness of breath in the last 12 months?</p> | <p><b>Answer YES to Q95</b><br/>In the last 12 months have you been seen by a general practitioner (for any reason, apart from accidents and injuries)?</p> <p style="text-align: center;">+</p> <p><b>≥1 examination reported at Q95.2</b><br/>How many were for breathing problems?</p> <p style="text-align: center;"><i>or</i></p> <p><b>Answer YES to Q96</b><br/>In the last 12 months have you been seen by a specialist (for any reason, apart from accidents and injuries)?</p> <p style="text-align: center;">+</p> <p><b>≥1 examination reported at Q96.2</b><br/>How many times have you seen a specialist (chest physician, allergy specialist, internal medicine specialist, ENT doctor) because of breathing problems in the last 12 months?</p> |



**Table E3**

Number of participants in ECRHS I, II and III, and number of subjects included in the analysis, by centre and sample. <sup>a</sup>

| Country        | Centre                                 | ECRHS I<br>(1991–1993) | ECRHS II<br>(1999–2002) | ECRHS III<br>(2010–2013) | Subjects<br>included |
|----------------|----------------------------------------|------------------------|-------------------------|--------------------------|----------------------|
| Belgium        | Antwerp City                           | 651                    | 333                     | 194                      | 172                  |
|                | Antwerp South                          | 634                    | 386                     | 170                      | 129                  |
| Estonia        | Tartu                                  | 558                    | 328                     | 165                      | 132                  |
| Germany        | Erfurt                                 | 731                    | 287                     | 336                      | 301                  |
|                | Hamburg                                | 1252                   | 303                     | 304                      | 260                  |
| Spain          | Albacete                               | 626                    | 449                     | 244                      | 232                  |
|                | Barcelona                              | 515                    | 361                     | 213                      | 130                  |
|                | Galdakao                               | 592                    | 443                     | 385                      | 313                  |
|                | Huelva                                 | 403                    | 306                     | 156                      | 137                  |
|                | Oviedo                                 | 524                    | 342                     | 185                      | 166                  |
| France         | Bordeaux                               | 544                    | 165                     | 206                      | 114                  |
|                | Grenoble                               | 522                    | 423                     | 378                      | 268                  |
|                | Montpellier                            | 456                    | 202                     | 187                      | 122                  |
|                | Paris                                  | 651                    | 433                     | 360                      | 212                  |
| Italy          | Pavia                                  | 310                    | 192                     | 77                       | 66                   |
| Iceland        | Reykjavik                              | 647                    | 524                     | 453                      | 386                  |
| Norway         | Bergen                                 | 835                    | 596                     | 365                      | 338                  |
|                | Gothenburg                             | 866                    | 628                     | 342                      | 243                  |
| Sweden         | Umea                                   | 708                    | 543                     | 297                      | 230                  |
|                | Uppsala                                | 823                    | 679                     | 422                      | 312                  |
| Australia      | Melbourne                              | 876                    | 637                     | 318                      | 261                  |
| United Kingdom | Ipswich                                | 559                    | 373                     | 182                      | 155                  |
|                | Norwich                                | 581                    | 318                     | 183                      | 159                  |
|                | <i>Random sample</i>                   | 12756 (86%)            | 7786 (84%)              | 5291 (86%)               | 4170 (86%)           |
|                | <i>Symptomatic sample</i> <sup>b</sup> | 2108 (14%)             | 1465 (16%)              | 831 (14%)                | 668 (14%)            |
|                | Total                                  | 14864 (100%)           | 9251 (100%)             | 6122 (100%)              | 4838 (100%)          |

<sup>a</sup> centres excluded were: Aarhus, Denmark (did not take part in ECRHS II); Cardiff, UK and Portland, USA (did not take part in ECRHS III); Verona and Turin, Italy (did not collect post-BD lung function data); Basel, Switzerland (did not collect data on respiratory medication use).

<sup>b</sup> consisting of subjects who reported recent respiratory symptoms, asthma attacks, or use of asthma medication in ECRHS stage 1 (postal screening questionnaire)

**Table E4**

Baseline characteristics of participants in ECRHS I, II, III, and of the subsample of ECRHS III participants included in the analysis. <sup>a</sup>

| Characteristics                         | ECRHS I participants | ECRHS II participants | ECRHS III participants | Subjects included |
|-----------------------------------------|----------------------|-----------------------|------------------------|-------------------|
| N.                                      | 14864                | 9251                  | 6122                   | 4838              |
| Female sex                              | 7772 (52.3)          | 4885 (52.8)           | 3243 (53.0)            | 2558 (52.9)       |
| Age (year)                              | 33.6±7.2             | 34.0±7.2              | 34.3±7.1               | 34.1±7.1          |
| BMI (kg/m <sup>2</sup> )                | 23.9±3.9             | 24.0±3.9              | 23.9±3.8               | 24.0±3.8          |
| Low education                           | 2323 (15.8)          | 1187 (12.8)           | 754 (12.4)             | 582 (12.0)        |
| Smoking habits                          |                      |                       |                        |                   |
| never smoker                            | 6123 (41.2)          | 4047 (43.8)           | 2711 (44.3)            | 2133 (44.1)       |
| ex-smoker                               | 5257 (35.4)          | 3178 (34.4)           | 2156 (35.2)            | 1693 (35.0)       |
| current smoker                          | 3473 (23.4)          | 2024 (21.9)           | 1253 (20.5)            | 1011 (20.9)       |
| Ever asthma                             | 1855 (12.5)          | 1217 (13.2)           | 749 (12.3)             | 568 (11.8)        |
| Allergic sensitisation                  |                      |                       |                        |                   |
| present <sup>b</sup>                    | 3789 (32.6)          | 2481 (32.2)           | 1654 (31.4)            | 1305 (30.9)       |
| absent                                  | 7818 (67.4)          | 5221 (67.8)           | 3606 (68.6)            | 2923 (69.1)       |
| Pre-BD FEV <sub>1</sub> % predicted (%) | 98.8±13.3            | 99.2±13.1             | 99.6±13.1              | 99.6±13.0         |

<sup>a</sup> n. (%) of subjects with a characteristic or mean±SD.

<sup>b</sup> having specific IgE >0.35 kU/L for at least one among house-dust mite, timothy grass, or cat allergens

**Table E5**

Distribution of the GOLD-defined key indicators for COPD among the subjects with postbronchodilator FEV<sub>1</sub>/FVC < LLN, asthma+COPD, or COPD alone. <sup>a</sup>

| Key COPD indicator             | Definition                                                                                                                                  | Post-BD FEV <sub>1</sub> /FVC < LLN (n=295) | Asthma+COPD (n=179) | COPD alone (n=111) |
|--------------------------------|---------------------------------------------------------------------------------------------------------------------------------------------|---------------------------------------------|---------------------|--------------------|
| <b>History of exposures</b>    | ≥10 pack-years smoked <b>and/or</b> ≥5 years of low-intensity exposure to occupational agents                                               | 196/243 (80.7)                              | 111/146 (76.0)      | 85/93 (91.4)       |
| <b>Symptoms at ECRHS III</b>   | chronic cough <b>and/or</b> chronic sputum production <b>and/or</b> dyspnoea <b>and/or</b> shortness of breath following strenuous activity | 214/291 (73.5)                              | 151/175 (86.3)      | 63/111 (56.8)      |
| <b>Early-life risk factors</b> | respiratory infections before age of 5 <b>and/or</b> parent suffered from chronic bronchitis, emphysema or COPD                             | 115/293 (39.2)                              | 71/177 (40.1)       | 44/111 (39.6)      |
| <b>Number of indicators</b>    | none                                                                                                                                        | 5 (1.7%) <sup>b</sup>                       | -                   | -                  |
|                                | 1                                                                                                                                           | 110 (37.3)                                  | 59 (33.0)           | 51 (46.0)          |
|                                | 2                                                                                                                                           | 125 (42.4)                                  | 86 (48.0)           | 39 (35.1)          |
|                                | 3                                                                                                                                           | 55 (18.6)                                   | 34 (19.0)           | 21 (18.9)          |

<sup>a</sup> n. of subjects with a characteristic / N. of subjects with available data (%)

<sup>b</sup> eventually classified as having past asthma alone (n=1) or current asthma alone (n=4)

**Table E6**Prebronchodilator lung function measurements and use of respiratory medication at ECRHS I, II, and III by disease group. <sup>a</sup>

|                                                                            | Reference subjects (n=3477) | Past asthma alone (n=263) | Current asthma alone (n=808) | Asthma+COPD (n=179) | COPD alone (n=111) |
|----------------------------------------------------------------------------|-----------------------------|---------------------------|------------------------------|---------------------|--------------------|
| <b>Prebronchodilator FEV<sub>1</sub> (L)</b>                               |                             |                           |                              |                     |                    |
| ECRHS I                                                                    | 3.83±0.78                   | 3.52±0.73                 | 3.46±0.80                    | 3.04±0.81           | 3.67±0.86          |
| ECRHS II                                                                   | 3.62±0.78                   | 3.33±0.75                 | 3.27±0.77                    | 2.76±0.75           | 3.24±0.84          |
| ECRHS III                                                                  | 3.12±0.72                   | 2.89±0.72                 | 2.79±0.72                    | 2.19±0.70           | 2.51±0.79          |
| <b>Prebronchodilator FVC (L)</b>                                           |                             |                           |                              |                     |                    |
| ECRHS I                                                                    | 4.58±0.97                   | 4.33±0.93                 | 4.27±0.97                    | 4.32±1.07           | 4.91±1.18          |
| ECRHS II                                                                   | 4.45±0.97                   | 4.19±0.91                 | 4.14±0.98                    | 4.12±1.04           | 4.52±1.15          |
| ECRHS III                                                                  | 4.06±0.94                   | 3.84±0.93                 | 3.74±0.94                    | 3.64±1.03           | 4.07±1.19          |
| <b>Prebronchodilator %FEV<sub>1</sub>/FVC</b>                              |                             |                           |                              |                     |                    |
| ECRHS I                                                                    | 83.8±5.9                    | 81.6±6.4                  | 81.1±7.4                     | 70.2±8.3            | 75.6±6.4           |
| ECRHS II                                                                   | 81.6±5.4                    | 79.7±5.6                  | 79.2±6.6                     | 67.0±7.4            | 71.7±6.3           |
| ECRHS III                                                                  | 77.1±5.0                    | 75.5±5.2                  | 74.9±5.6                     | 59.8±6.8            | 61.5±6.3           |
| <b>Postbronchodilator FEV<sub>1</sub> (L)</b>                              |                             |                           |                              |                     |                    |
| ECRHS III                                                                  | 3.19±0.73                   | 2.99±0.72                 | 2.90±0.73                    | 2.34±0.71           | 2.65±0.82          |
| <b>Postbronchodilator FVC (L)</b>                                          |                             |                           |                              |                     |                    |
| ECRHS III                                                                  | 4.02±0.94                   | 3.83±0.92                 | 3.74±0.95                    | 3.82±1.03           | 4.21±1.18          |
| <b>Postbronchodilator %FEV<sub>1</sub>/FVC</b>                             |                             |                           |                              |                     |                    |
| ECRHS III                                                                  | 79.6±4.9                    | 78.3±4.9                  | 77.7±5.4                     | 61.0±6.5            | 62.5±5.8           |
| <b>Any inhaled or oral medicine for breathing problems, last 12 months</b> |                             |                           |                              |                     |                    |
| ECRHS I                                                                    | 358/3471 (10.3)             | 76/263 (28.9)             | 395/802 (49.2)               | 101/177 (57.1)      | 11/177 (9.9)       |
| ECRHS II                                                                   | 151/3027 (5.0)              | 65/242 (26.9)             | 378/731 (51.7)               | 98/148 (66.2)       | 5/92 (5.4)         |
| ECRHS III                                                                  | 176/3439 (5.1)              | 0/259 (0.0)               | 488/798 (61.2)               | 129/177 (72.9)      | 12/111 (10.8)      |
| <b>Short-acting β<sub>2</sub>-agonists, last 12 months</b>                 |                             |                           |                              |                     |                    |
| ECRHS I                                                                    | 25/3464 (0.7)               | 35/261 (13.4)             | 256/798 (32.1)               | 80/174 (46.0)       | 0/111 (0.0)        |
| ECRHS II                                                                   | 32/3029 (1.1)               | 41/241 (17.0)             | 288/721 (39.9)               | 78/145 (53.8)       | 1/92 (1.1)         |
| ECRHS III                                                                  | 56/3452 (1.6)               | 0/262 (0.0)               | 317/740 (42.8)               | 80/157 (51.0)       | 2/107 (1.9)        |
| <b>ICS, last 12 months</b>                                                 |                             |                           |                              |                     |                    |
| ECRHS I                                                                    | 18/3460 (0.5)               | 15/254 (5.9)              | 110/771 (14.3)               | 37/168 (22.0)       | 0/111 (0.0)        |
| ECRHS II                                                                   | 29/3031 (1.0)               | 18/241 (7.5)              | 176/723 (24.3)               | 61/145 (42.1)       | 1/92 (1.1)         |

|                                                 |           |               |             |                |               |             |
|-------------------------------------------------|-----------|---------------|-------------|----------------|---------------|-------------|
|                                                 | ECRHS III | 47/3450 (1.4) | 0/262 (0)   | 283/737 (38.4) | 90/164 (54.9) | 4/106 (3.8) |
| Long-acting $\beta_2$ -agonists, last 12 months |           |               |             |                |               |             |
|                                                 | ECRHS II  | 2/3031 (0.1)  | 3/241 (1.2) | 58/718 (8.1)   | 30/145 (20.7) | 1/92 (1.1)  |
|                                                 | ECRHS III | 24/3446 (0.7) | 0/262 (0)   | 205/719 (28.5) | 77/155 (49.7) | 3/107 (2.8) |

<sup>a</sup> mean $\pm$ SD or n. of subjects with a characteristic / N. of subjects with available data (%).

**Table E7**

Participants' characteristics at the time of disease classification (ECRHS III). **Sensitivity analysis using disease definitions based on the GOLD fixed cut-off.**<sup>a</sup>

|                                                                               | Reference subjects<br>(n=3360) | Past asthma alone<br>(n=253) | Current asthma<br>alone (n=750) | Asthma+COPD<br>(n=247) | COPD alone<br>(n=208) | Overall<br>p-value  |
|-------------------------------------------------------------------------------|--------------------------------|------------------------------|---------------------------------|------------------------|-----------------------|---------------------|
| Female sex                                                                    | 1719/3360 (51.2)               | 162/253 (64.0)               | 469/750 (62.5)                  | 117/247 (47.4)         | 82/208 (39.4)         | <0.001              |
| Age (years)                                                                   | 53.9 $\pm$ 7.1                 | 53.9 $\pm$ 7.2               | 53.7 $\pm$ 7.1                  | 55.9 $\pm$ 6.8         | 57.5 $\pm$ 6.1        | <0.001              |
| Low education (completed before<br>age 16)                                    | 367/3356 (10.9)                | 40/252 (15.9)                | 107/747 (14.3)                  | 42/246 (17.1)          | 24/207 (11.6)         | 0.002               |
| Body mass index                                                               | 27.0 $\pm$ 4.7                 | 27.1 $\pm$ 4.8               | 28.2 $\pm$ 5.6                  | 27.5 $\pm$ 5.5         | 26.4 $\pm$ 4.7        | <0.001              |
| Obesity (body mass index $\geq$ 30<br>kg/m <sup>2</sup> )                     | 742/3340 (22.2)                | 55/253 (21.7)                | 239/744 (32.1)                  | 67/245 (27.4)          | 40/207 (19.3)         | <0.001              |
| Physical activity (exercising for $\geq$ 1<br>hour and $\geq$ 2 times a week) | 1445/3343 (43.2)               | 124/252 (49.2)               | 323/744 (43.4)                  | 100/244 (41.0)         | 66/207 (31.9)         | 0.005               |
| BDR (mL)                                                                      | 56.3 (-9.4–128.2)              | 97.6 (15.7–167.5)            | 87.8 (19.4–165.0)               | 132.5 (50.6–241.3)     | 88.5 (15.0–182.5)     | <0.001 <sup>d</sup> |
| BDR (%)                                                                       | 1.9 (-0.3–4.2)                 | 3.5 (0.6–6.2)                | 3.3 (0.7–6.3)                   | 5.9 (2.1–11.3)         | 3.5 (0.6–7.1)         | <0.001 <sup>d</sup> |
| BDR (>12% and > 200mL)                                                        | 65/3275 (2.0)                  | 8/248 (3.2)                  | 46/730 (6.3)                    | 52/245 (21.2)          | 15/200 (7.5)          | <0.001 <sup>d</sup> |
| Marked BDR (>12% and ><br>400mL)                                              | 25/3275 (0.8)                  | 1/248 (0.4)                  | 19/730 (2.6)                    | 19/245 (7.8)           | - <sup>b</sup>        | <0.001 <sup>d</sup> |
| FeNO (ppb), non-current smokers                                               | 18.0 (13.0–25.0)               | 18.0 (12.0–27.0)             | 21.0 (14.0–32.0)                | 22.0 (14.0–38.0)       | 18.0 (14.0–26.0)      | <0.001              |
| FeNO $\geq$ 25 ppb (non-current<br>smokers)                                   | 665/2655 (25.1)                | 58/213 (27.2)                | 230/604 (38.1)                  | 78/181 (43.1)          | 33/103 (32.0)         | <0.001              |
| FeNO (ppb), current smokers                                                   | 11.0 (8.0–16.0)                | 14.0 (11.0–20.0)             | 11.5 (8.0–16.0)                 | 10.0 (6.0–13.0)        | 11.0 (7.0–16.0)       | 0.005               |
| FeNO $\geq$ 25 ppb (current smokers)                                          | 47/528 (8.9)                   | 4/27 (14.8)                  | 13/120 (10.8)                   | 4/56 (7.1)             | 11/97 (11.3)          | 0.719               |

|                                                                                |                  |                  |                   |                   |                  |                     |
|--------------------------------------------------------------------------------|------------------|------------------|-------------------|-------------------|------------------|---------------------|
| Childhood asthma onset (<18 years)                                             | - <sup>b</sup>   | 72/175 (41.2)    | 239/622 (38.4)    | 101/205 (49.3)    | - <sup>b</sup>   | 0.024               |
| Late asthma onset (>40 years)                                                  | - <sup>b</sup>   | 20/175 (11.4)    | 102/622 (16.4)    | 29/205 (14.2)     | - <sup>b</sup>   | 0.246               |
| Asthma-like symptoms, last 12 months                                           | 1058/3301 (32.1) | - <sup>b</sup>   | 670/748 (89.6)    | 202/245 (82.5)    | 119/204 (58.3)   | <0.001              |
| Key COPD symptoms, last 12 months                                              | 955/3286 (29.1)  | 36/246 (14.6)    | 581/743 (78.2)    | 204/243 (84.0)    | 109/205 (53.2)   | <0.001 <sup>d</sup> |
| Chronic cough/sputum production                                                | 325/3312 (9.8)   | 13/249 (5.2)     | 194/734 (26.4)    | 79/241 (32.8)     | 49/204 (24.0)    | <0.001 <sup>d</sup> |
| Medical Research Council dyspnoea score >1                                     | 488/2670 (18.3)  | 29/204 (14.2)    | 205/585 (35.0)    | 76/198 (38.4)     | 54/152 (35.5)    | <0.001              |
| Hay fever                                                                      | 897/3346 (26.8)  | 122/252 (48.4)   | 436/745 (58.5)    | 131/246 (53.3)    | 38/207 (18.4)    | <0.001              |
| Eczema, ever                                                                   | 1289/3339 (38.6) | 116/252 (46.0)   | 437/745 (58.7)    | 129/244 (52.9)    | 76/207 (36.7)    | <0.001              |
| Allergic sensitisation <sup>c</sup>                                            | 625/3203 (19.5)  | 105/241 (43.6)   | 345/713 (48.4)    | 115/239 (48.1)    | 31/200 (15.5)    | <0.001              |
| Total serum IgE (kU/L)                                                         | 14.5 (10.2–60.4) | 31.4 (11.8–69.0) | 44.5 (17.4–113.1) | 76.0 (19.9–180.9) | 27.4 (12.8–64.9) | <0.001              |
| Cat owner                                                                      | 693/3351 (20.7)  | 49/252 (19.4)    | 132/747 (17.7)    | 41/245 (16.7)     | 32/208 (15.4)    | 0.099               |
| Dog owner                                                                      | 637/3348 (19.0)  | 48/252 (19.1)    | 173/748 (23.1)    | 56/246 (22.8)     | 25/207 (12.1)    | 0.003               |
| Mould in the house, ever                                                       | 700/3313 (21.1)  | 41/250 (16.4)    | 188/734 (25.6)    | 55/244 (22.5)     | 49/206 (23.8)    | 0.018               |
| Mould in the house, last 12 months                                             | 482/3310 (14.6)  | 25/248 (10.1)    | 120/729 (16.5)    | 39/243 (16.1)     | 34/206 (16.5)    | 0.141               |
| Heart disease (angina, heart attack, coronary heart disease)                   | 94/3333 (2.8)    | 5/251 (2.0)      | 32/746 (4.3)      | 10/243 (4.1)      | 10/206 (4.9)     | 0.086               |
| Emergency Room/hospital admission for breathing problems since the last survey | 125/3335 (3.8)   | 15/251 (6.0)     | 94/747 (12.6)     | 45/245 (18.4)     | 10/206 (4.9)     | <0.001              |

<sup>a</sup> n. of subjects with a characteristic / N. of subjects with available data (%), mean±SD or median (Q1–Q3)

<sup>b</sup> 0% frequency forced by disease definitions

<sup>c</sup> having specific IgE >0.35 kU/L for at least one among house-dust mite, timothy grass, or cat allergens

<sup>d</sup> this characteristic (or a closely related one) was considered for disease definition

**Table E8**Early-life and lifelong exposure to risk factors and clinical characteristics. **Sensitivity analysis using disease definitions based on the GOLD fixed cut-off.**<sup>a</sup>

|                                                | Reference subjects<br>(n=3360) | Past asthma alone<br>(n=253) | Current asthma alone<br>(n=750) | Asthma+COPD<br>(n=247) | COPD alone<br>(n=208) | Overall<br>p-value  |
|------------------------------------------------|--------------------------------|------------------------------|---------------------------------|------------------------|-----------------------|---------------------|
| Respiratory infections in childhood            | 275/3174 (8.7)                 | 37/240 (15.4)                | 117/693 (22.6)                  | 51/266 (22.6)          | 27/201 (13.4)         | <0.001 <sup>e</sup> |
| Maternal smoking in childhood                  | 698/3323 (21.0)                | 63/250 (25.2)                | 193/739 (26.1)                  | 65/239 (27.2)          | 46/207 (22.2)         | 0.008               |
| Cat in childhood                               | 1514/3354 (45.1)               | 110/253 (43.5)               | 336/747 (45.0)                  | 114/245 (46.5)         | 115/208 (55.3)        | 0.066               |
| Dog in childhood                               | 1446/3356 (43.1)               | 104/253 (41.1)               | 331/747 (44.3)                  | 103/245 (42.0)         | 84/208 (40.4)         | 0.813               |
| Parental asthma                                | 292/3123 (9.4)                 | 47/240 (19.6)                | 175/699 (25.0)                  | 56/221 (25.3)          | 30/195 (15.4)         | <0.001              |
| Parental COPD                                  | 569/3058 (18.6)                | 45/234 (19.2)                | 173/678 (25.5)                  | 63/223 (28.3)          | 54/182 (29.7)         | <0.001 <sup>e</sup> |
| History of heavy smoking                       | 987/2617 (37.7)                | 64/205 (31.2)                | 206/620 (33.2)                  | 108/196 (55.1)         | 126/167 (75.5)        | <0.001 <sup>e</sup> |
| History of occupational exposures              | 1238/3172 (39.0)               | 95/241 (39.4)                | 275/710 (38.7)                  | 104/223 (46.6)         | 102/194 (52.6)        | 0.001 <sup>e</sup>  |
| History of AHR <sup>b</sup>                    | 134/1934 (6.9)                 | 133/197 (67.5)               | 382/552 (69.2)                  | 147/167 (88.0)         | 16/106 (15.1)         | <0.001              |
| History of high total IgE <sup>c</sup>         | 892/2535 (35.2)                | 129/212 (60.9)               | 412/623 (66.1)                  | 139/204 (68.1)         | 63/167 (37.7)         | <0.001              |
| History of allergic sensitisation <sup>d</sup> | 1009/2782 (36.3)               | 136/223 (61.0)               | 445/668 (66.6)                  | 150/222 (67.6)         | 68/183 (37.2)         | <0.001              |

<sup>a</sup> n. of subjects with a characteristic / N. of subjects with available data (%)<sup>b</sup> having a 20% decrease of FEV<sub>1</sub> at a methacholine dose ≤1 mg at ECRHS I and/or II<sup>c</sup> having total IgE >100 kU/L at ECRHS I, II and/or III<sup>d</sup> having specific IgE >0.35 kU/L for at least one among house-dust mite, timothy grass, or cat allergens at ECRHS I, II and/or III<sup>e</sup> this characteristic (or a closely related one) was considered for disease definition

**Table E9**Review of cohort studies comparing FEV<sub>1</sub> decline between subjects with asthma+COPD and COPD alone.

| Reference           | Setting (f-up time)                                                          | Source population                                                               | Participants' age and sex at the time of disease classification | COPD alone                                                                                                                                                   |                                                    | Asthma+COPD                                                                                                                                                    |                                                                 |
|---------------------|------------------------------------------------------------------------------|---------------------------------------------------------------------------------|-----------------------------------------------------------------|--------------------------------------------------------------------------------------------------------------------------------------------------------------|----------------------------------------------------|----------------------------------------------------------------------------------------------------------------------------------------------------------------|-----------------------------------------------------------------|
|                     |                                                                              |                                                                                 |                                                                 | Definition (number of subjects)                                                                                                                              | Adult-life change in FEV <sub>1</sub> <sup>a</sup> | Definition (number of subjects)                                                                                                                                | Adult-life change in FEV <sub>1</sub> <sup>a</sup>              |
| Fu et al. (6)       | John Hunter hospital in Newcastle, Australia (f-up ~4 y)                     | Hospital-based outpatients with obstructive airway diseases, no current smokers | Mean age 69 y, 58% women                                        | Post-BD FEV <sub>1</sub> /FVC <0.7 + post-BD FEV <sub>1</sub> <80% predicted + no increased airflow variability (neither AHR nor BDR) (n=36)                 | -24 mL/y (post-BD)                                 | Post-BD FEV <sub>1</sub> /FVC <0.7 + post-BD FEV <sub>1</sub> <80% predicted + respiratory symptoms + increased airflow variability (either AHR or BDR) (n=55) | -14 mL/y (post-BD)                                              |
| de Marco et al. (7) | European Community Respiratory Health Survey, European countries (f-up ~9 y) | General population + sample enriched for respiratory symptoms                   | Mean age 34 y, 53% women                                        | Pre-BD FEV <sub>1</sub> /FVC <LLN at baseline and f-up + one among: chronic bronchitis, dyspnoea, ≥10 pack-y smoked, occupational inhalant exposures (n=166) | -37 mL/y (pre-BD)                                  | COPD + report of asthma + one among: current respiratory symptoms/medication, AHR <i>or</i> COPD + current respiratory symptoms + AHR (n=218)                  | -26 mL/y (pre-BD)                                               |
| Lange et al. (8)    | Copenhagen City Heart study, Denmark (f-up ~18 y)                            | General population                                                              | Mean age 57 y, 43% women                                        | Post-BD FEV <sub>1</sub> /FVC <0.7 + ≥10 pack-y smoked + neither report of asthma nor BDR (n=303)                                                            | -46 mL/y (pre-BD)                                  | Post-BD FEV <sub>1</sub> /FVC <0.7 regardless of smoking history + report of asthma before age 40 y (early-onset, n=62) or after age 40 y (late-onset, n=188)  | -31 mL/y (pre-BD, early-onset)<br>-51 mL/y (pre-BD, late-onset) |
| Suzuki et al. (9)   | Hokkaido COPD cohort study, Japan (f-up ~5 y)                                | Hospital-based outpatients with diagnosed COPD                                  | Mean age 69 y, 6% women                                         | Respiratory specialist diagnosis confirmed by post-BD FEV <sub>1</sub> /FVC <0.7 + ≥10 pack-y smoked (n=135) + no diagnosed asthma                           | -34 mL/y (post-BD)                                 | COPD + 2 among: BDR, atopy, blood eosinophilia (n=31) + no diagnosed asthma                                                                                    | -27 mL/y (post-BD)                                              |
| Tkacova et al. (10) | Lung Health Study, USA and Canada (f-up ~3 y)                                | Clinical trial                                                                  | Median age 49 y, 37% women                                      | Post-BD FEV <sub>1</sub> /FVC <0.7 + FEV <sub>1</sub> 55–90% predicted + smoker ≥10 cigs/day (n=4453)                                                        | -55 mL/y (pre-BD)                                  | COPD + AHR (n=1434)                                                                                                                                            | -65 mL/y (pre-BD)                                               |

|                               |                                                                               |                                                               |                          |                                                                                                                                                                          |                            |                                                                                                                                                                              |                             |
|-------------------------------|-------------------------------------------------------------------------------|---------------------------------------------------------------|--------------------------|--------------------------------------------------------------------------------------------------------------------------------------------------------------------------|----------------------------|------------------------------------------------------------------------------------------------------------------------------------------------------------------------------|-----------------------------|
| Bui et al. (11)               | Tasmanian Longitudinal Health Study, Australia (f-up ~27 y)                   | General population + sample enriched for respiratory symptoms | Mean age 45 y, 49% women | Post-BD FEV <sub>1</sub> /FVC <LLN, regardless of smoking (n=59)                                                                                                         | -0.6% predicted/y (pre-BD) | COPD + history of asthma + current respiratory symptoms/medication (n=68)                                                                                                    | - 0.3% predicted/y (pre-BD) |
| Hayden et al. (12)            | COPDGene study, United States (f-up ~5 y)                                     | General population,                                           | Mean age 68 y, 76% women | Post-BD FEV <sub>1</sub> /FVC <0.7 + post-BD FEV <sub>1</sub> <80% predicted + ≥10 pack-y smoked (n=1,359)                                                               | -38 mL/y (post-BD)         | COPD + report of asthma before age 40 y (n=242)                                                                                                                              | -32 mL/y (post-BD)          |
| Park et al. (13)              | Korean Obstructive Lung Disease cohort study, Republic of Korea (f-up ~6 y)   | Hospital-based outpatients with COPD                          | Mean age 66 y, 2% women  | Post-BD FEV <sub>1</sub> /FVC <0.7 + ≥10 pack-y smoked (n=192)                                                                                                           | -29 mL/y (pre-BD)          | COPD + either history of asthma or marked BDR + one among: history of atopy/allergic rhinitis, BDR on two occasions, blood eosinophilia (n=47)                               | -14 mL/y (pre-BD)           |
| Barrecheuren et al. (14)      | Canadian Cohort Obstructive Lung Disease study, Canada (f-up ~3 y)            | General population                                            | Mean age 67 y, 39% women | Post-BD FEV <sub>1</sub> /FVC <0.70 + history of smoking + none of these: BDR, atopy, report of physician-diagnosed asthma (n=182)                                       | -51 mL/yr (pre-BD)         | Post-BD FEV <sub>1</sub> /FVC <0.70 + history of smoking + one among: BDR, atopy, report of physician-diagnosed asthma (n=188)                                               | -44 mL/y (pre-BD)           |
| Marcon et al. (present study) | European Community Respiratory Health Survey, European countries (f-up ~20 y) | General population + sample enriched for respiratory symptoms | Mean age 54 y, 53% women | Post-BD FEV <sub>1</sub> /FVC <LLN + one among: history of smoking, occupational exposures, key symptoms, early-life risk factors + no history of asthma + no marked BDR | -46.5 mL/yr (pre-BD)       | Post-BD FEV <sub>1</sub> /FVC <LLN + one among: history of smoking, occupational exposures, key symptoms, early-life risk factors + one among: history of asthma, marked BDR | -36.5 mL/yr (pre-BD)        |

AHR = airway hyperresponsiveness; BD= bronchodilator; BDR= bronchodilator responsiveness; f-up = follow-up; LLN = lower limit of normal

<sup>a</sup> Unadjusted estimates; if not provided in the original publications, estimates adjusted for basic covariates were reported; some data were extrapolated from illustrations



**Figure E1**

Decision tree illustrating disease classification at ECRHS III. <sup>a</sup>

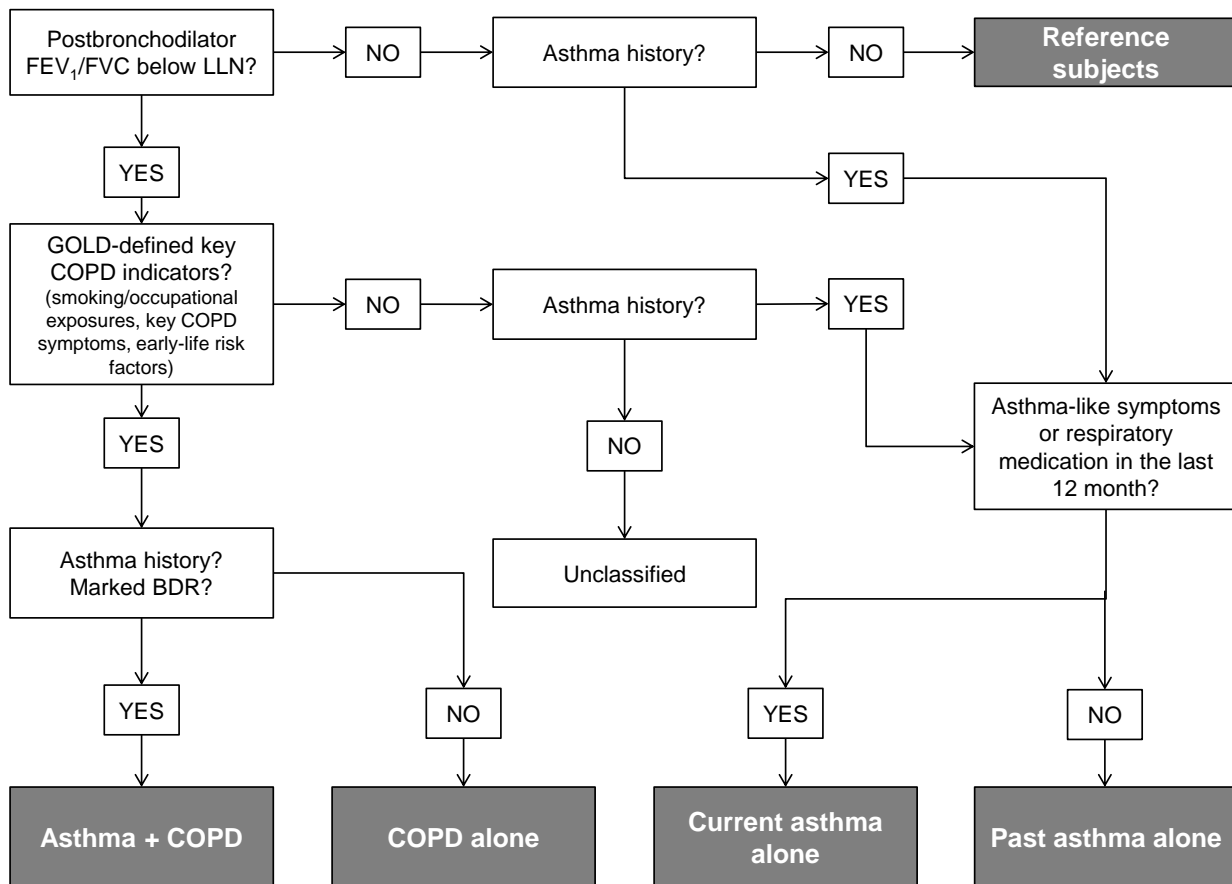

<sup>a</sup> All the criteria composing disease definitions were fulfilled at the time of ECRHS III either on the basis of data measured at ECRHS III (postbronchodilator FEV<sub>1</sub>/FVC, marked bronchodilator responsiveness [BDR], key COPD symptoms, asthma-like symptoms or respiratory medication in the last 12 months), or based on cumulative data (history of smoking/occupational exposures, history of asthma) or past data (early-life respiratory infections).

## Figure E2

Study timeline. <sup>a</sup>

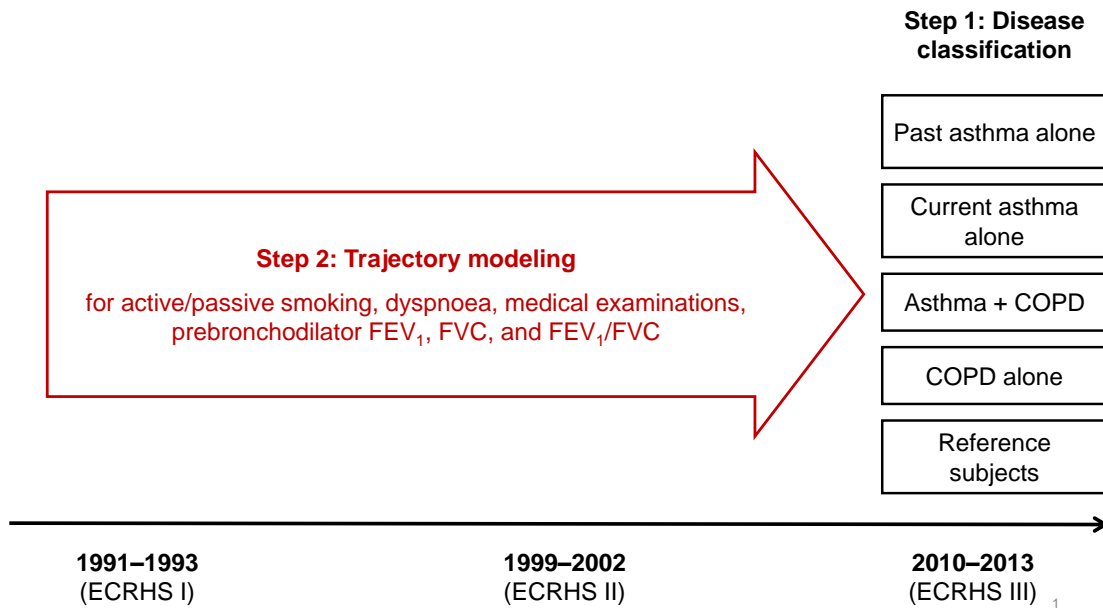

<sup>a</sup> Disease classification was conducted at ECRHS III, when postbronchodilator lung function data were available (step 1). Then, past trajectories of participants' characteristics were modelled for these phenotypes (step 2).

### Figure E3

Predicted trajectories for mean prebronchodilator FEV<sub>1</sub> % predicted (A) and FVC % predicted (B) as a function of disease group and age. <sup>a</sup>

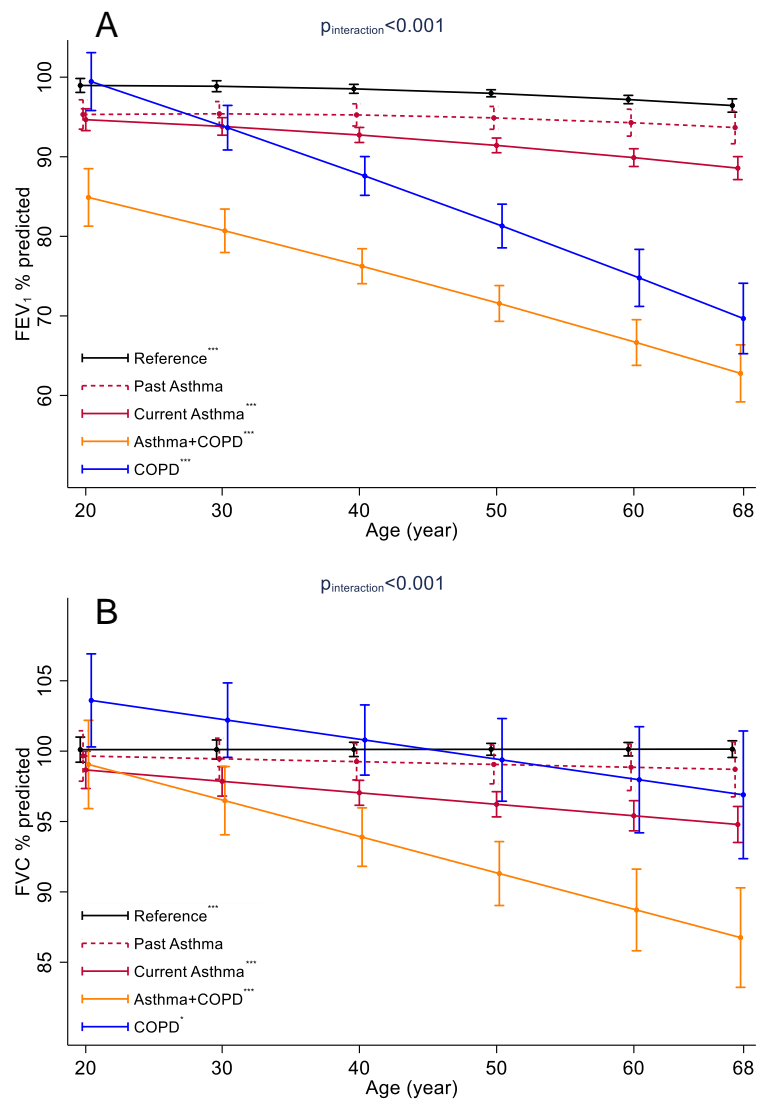

<sup>a</sup> N. of subjects contributing data = 4831 (FEV<sub>1</sub>) and 4822 (FVC).  $p_{\text{interaction}}$  obtained by Wald test (null hypothesis: true trajectories do not vary by disease group). The vertical lines represent 95% confidence intervals. Spirometer type was set to NDD EasyOne; quantitative/indicator independent variables were set equal to the mean/proportion calculated over the set of subjects included.

\*  $p < 0.05$ , \*\*\*  $p < 0.001$  for the test of significance of the age-related trend within a disease group (null hypothesis: true mean is constant across ages)

## Figure E4

Predicted trajectories for mean prebronchodilator FEV<sub>1</sub> (A), FVC (B), and FEV<sub>1</sub>/FVC ratio (C) as a function of disease group and age. **Sensitivity analysis restricted to the subjects with three lung function measurements (ECRHS I, II and III).**<sup>a</sup>

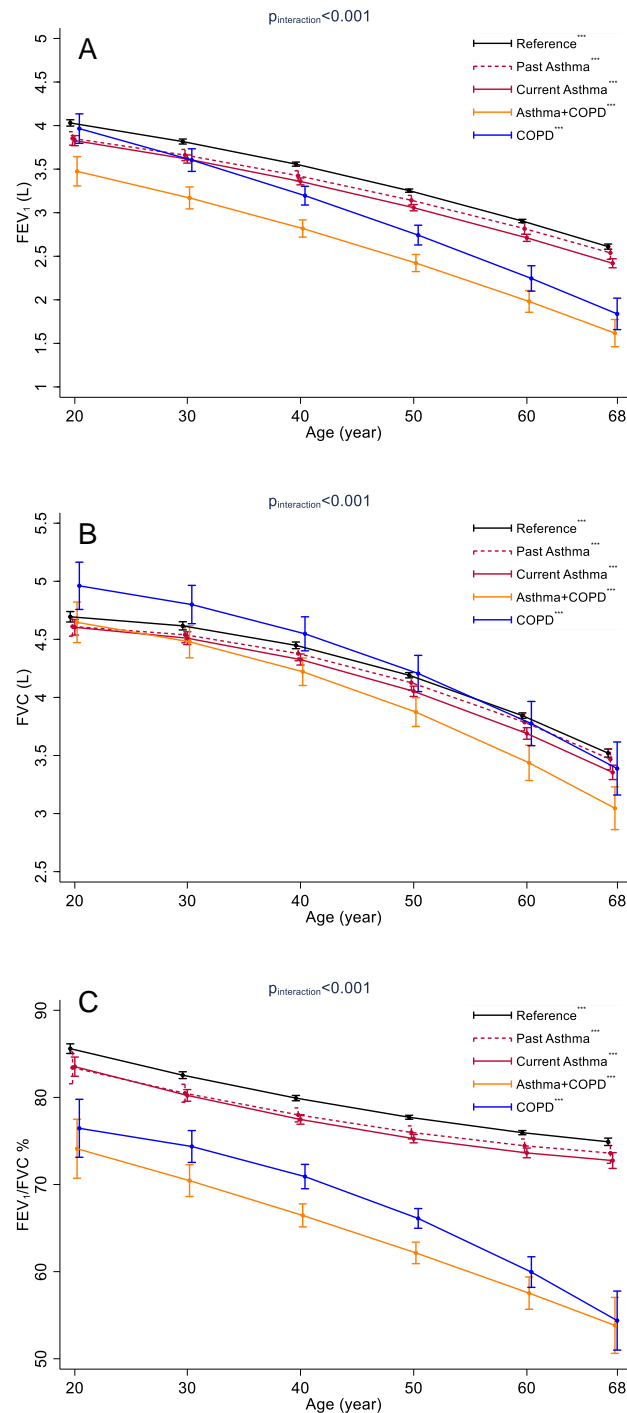

<sup>a</sup> N. of subjects contributing data = 3197 (FEV<sub>1</sub>), 3197 (FVC), and 3196 (FEV<sub>1</sub>/FVC).  $p_{\text{interaction}}$  obtained by Wald test (null hypothesis: true trajectories do not vary by disease group). The vertical lines represent 95% confidence intervals. Spirometer type was set to NDD EasyOne; quantitative/indicator independent variables were set equal to the mean/proportion calculated over the set of subjects included.

\*\*\*  $p < 0.001$  for the test of significance of the age-related trend within a disease group (null hypothesis: true mean is constant across ages)

## Figure E5

Predicted trajectories for mean prebronchodilator FEV<sub>1</sub> (A), FVC (B), and FEV<sub>1</sub>/FVC ratio (C) as a function of disease group and age. **Sensitivity analysis excluding the subjects with PRISm** (postbronchodilator FEV<sub>1</sub>/FVC >LLN in combination with FEV<sub>1</sub> or FVC <LLN).<sup>a</sup>

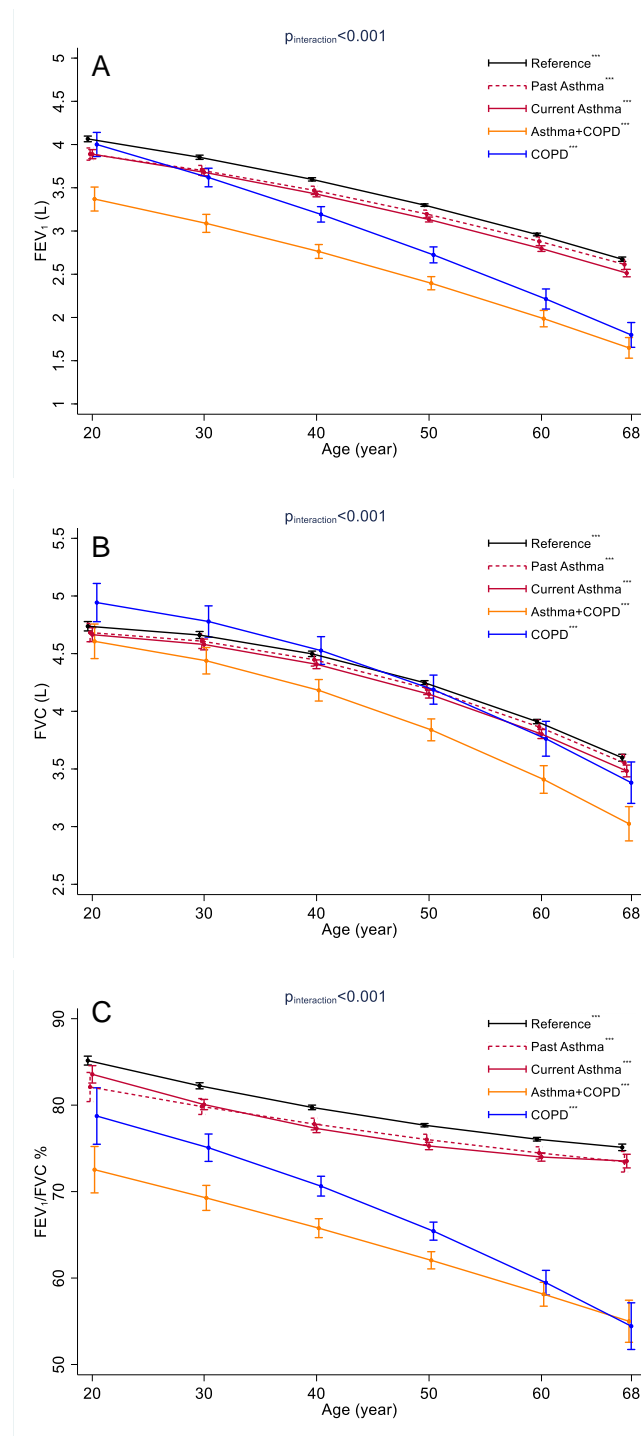

<sup>a</sup> N. of subjects contributing data = 4559 (FEV<sub>1</sub>), 4552 (FVC), and 4547 (FEV<sub>1</sub>/FVC).  $p_{\text{interaction}}$  obtained by Wald test (null hypothesis: true trajectories do not vary by disease group). The vertical lines represent 95% confidence intervals. Spirometer type was set to NDD EasyOne; quantitative/indicator independent variables were set equal to the mean/proportion calculated over the set of subjects included.

\*\*\*  $p < 0.001$  for the test of significance of the age-related trend within a disease group (null hypothesis: true mean is constant across ages)

## Figure E6

Predicted trajectories for the proportion of subjects reporting active smoking (A), passive smoking (B), dyspnoea (C), or having been seen by a physician during the last 12 months (D) as a function of disease group and age. **Sensitivity analysis using the GOLD fixed cut-off criterion for disease classification.**<sup>a</sup>

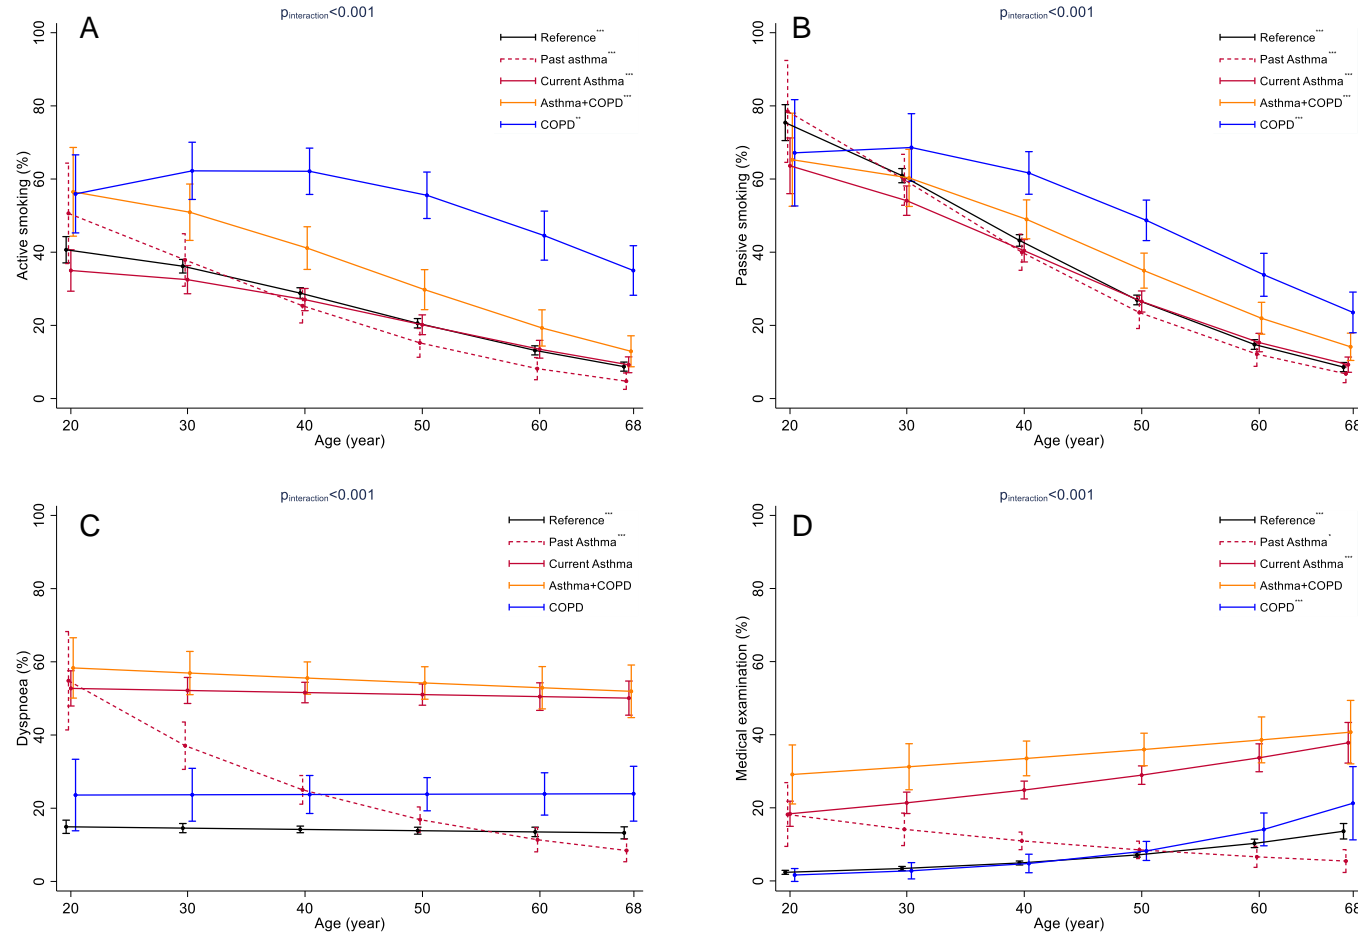

<sup>a</sup> N. of subjects contributing data = 4818.  $p_{\text{interaction}}$  obtained by Wald test (null hypothesis: true trajectories do not vary by disease group). The vertical lines represent 95% confidence intervals. Quantitative/indicator independent variables were set equal to the mean/proportion calculated over the set of subjects included.

\*  $p < 0.05$ , \*\*  $p < 0.01$ , \*\*\*  $p < 0.001$  for the test of significance of the age-related trend within a disease group (null hypothesis: true proportion is constant across ages)

## Figure E7

Predicted trajectories for mean prebronchodilator FEV<sub>1</sub> (A), FVC (B), and FEV<sub>1</sub>/FVC ratio (C) as a function of disease group and age. **Sensitivity analysis using the GOLD fixed cut-off criterion for disease classification.**<sup>a</sup>

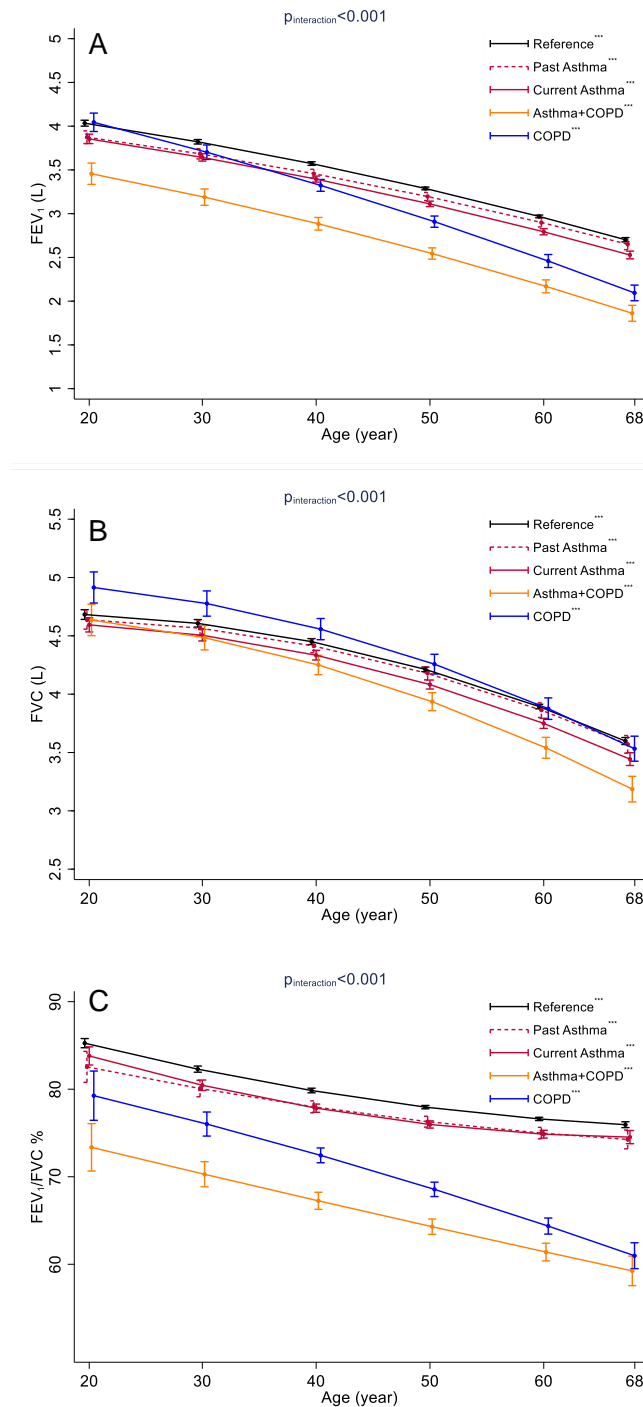

<sup>a</sup> N. of subjects contributing data = 4831 (FEV<sub>1</sub>), 4822 (FVC), and 4816 (FEV<sub>1</sub>/FVC). p<sub>interaction</sub> obtained by Wald test (null hypothesis: true trajectories do not vary by disease group). The vertical lines represent 95% confidence intervals. Spirometer type was set to NDD EasyOne; quantitative/indicator independent variables were set equal to the mean/proportion calculated over the set of subjects included.

\*\*\* p<0.001 for the test of significance of the age-related trend within a disease group (null hypothesis: true mean is constant across ages)

## References

1. Marcon A, Locatelli F, Keidel D, Beckmeyer-Borowko AB, Cerveri I, Dharmage SC, Fuertes E, Garcia-Aymerich J, Heinrich J, Imboden M, Janson C, Johannessen A, Leynaert B, Pascual Erquicia S, Pesce G, Schaffner E, Svanes C, Urrutia I, Jarvis D, Probst-Hensch NM, Accordini S. Airway responsiveness to methacholine and incidence of COPD: an international prospective cohort study. *Thorax* 2018; 73: 825-832.
2. Lytras T, Kogevinas M, Kromhout H, Carsin AE, Anto JM, Bentouhami H, Weyler J, Heinrich J, Nowak D, Urrutia I, Martinez-Moratalla J, Gullon JA, Vega AP, Raheison Semjen C, Pin I, Demoly P, Leynaert B, Villani S, Gislason T, Svanes O, Holm M, Forsberg B, Norback D, Mehta AJ, Probst-Hensch N, Benke G, Jogi R, Toren K, Sigsgaard T, Schlunssen V, Olivieri M, Blanc PD, Watkins J, Bono R, Buist AS, Vermeulen R, Jarvis D, Zock JP. Occupational exposures and incidence of chronic bronchitis and related symptoms over two decades: the European Community Respiratory Health Survey. *Occup Environ Med* 2019; 76: 222-229.
3. Global Initiative for Chronic Obstructive Lung Disease. Global strategy for the diagnosis, management and prevention of COPD. 2020.
4. Fuertes E, Carsin AE, Anto JM, Bono R, Corsico AG, Demoly P, Gislason T, Gullon JA, Janson C, Jarvis D, Heinrich J, Holm M, Leynaert B, Marcon A, Martinez-Moratalla J, Nowak D, Pascual Erquicia S, Probst-Hensch NM, Raheison C, Raza W, Gomez Real F, Russell M, Sanchez-Ramos JL, Weyler J, Garcia Aymerich J. Leisure-time vigorous physical activity is associated with better lung function: the prospective ECRHS study. *Thorax* 2018; 73: 376-384.
5. Chinn S, Jarvis D, Melotti R, Luczynska C, Ackermann-Liebrich U, Anto JM, Cerveri I, de Marco R, Gislason T, Heinrich J, Janson C, Kunzli N, Leynaert B, Neukirch F, Schouten J, Sunyer J, Svanes C, Vermeire P, Wjst M, Burney P. Smoking cessation, lung function, and weight gain: a follow-up study. *Lancet* 2005; 365: 1629-1635.
6. Fu JJ, Gibson PG, Simpson JL, McDonald VM. Longitudinal changes in clinical outcomes in older patients with asthma, COPD and asthma-COPD overlap syndrome. *Respiration* 2014; 87: 63-74.
7. de Marco R, Marcon A, Rossi A, Anto JM, Cerveri I, Gislason T, Heinrich J, Janson C, Jarvis D, Kuenzli N, Leynaert B, Probst-Hensch N, Svanes C, Wjst M, Burney P. Asthma, COPD and overlap syndrome: a longitudinal study in young European adults. *European Respiratory Journal* 2015; 46: 671-679.
8. Lange P, Colak Y, Ingebrigtsen TS, Vestbo J, Marott JL. Long-term prognosis of asthma, chronic obstructive pulmonary disease, and asthma-chronic obstructive pulmonary disease overlap in the Copenhagen City Heart study: a prospective population-based analysis. *Lancet Respir Med* 2016; 4: 454-462.
9. Suzuki M, Makita H, Konno S, Shimizu K, Kimura H, Kimura H, Nishimura M, Hokkaido CCSI. Asthma-like Features and Clinical Course of Chronic Obstructive Pulmonary Disease. An Analysis from the Hokkaido COPD Cohort Study. *Am J Respir Crit Care Med* 2016; 194: 1358-1365.
10. Tkacova R, Dai DLY, Vonk JM, Leung JM, Hiemstra PS, van den Berge M, Kunz L, Hollander Z, Tashkin D, Wise R, Connett J, Ng R, McManus B, Paul Man SF, Postma DS, Sin DD. Airway hyperresponsiveness in chronic obstructive pulmonary disease: A marker of asthma-chronic obstructive pulmonary disease overlap syndrome? *J Allergy Clin Immunol* 2016; 138: 1571-1579.
11. Bui DS, Burgess JA, Lowe AJ, Perret JL, Lodge CJ, Bui M, Morrison S, Thompson BR, Thomas PS, Giles GG, Garcia-Aymerich J, Jarvis D, Abramson MJ, Walters EH, Matheson MC, Dharmage SC. Childhood Lung Function Predicts Adult Chronic Obstructive Pulmonary Disease and Asthma-Chronic Obstructive Pulmonary Disease Overlap Syndrome. *Am J Respir Crit Care Med* 2017; 196: 39-46.
12. Hayden LP, Hardin ME, Qiu W, Lynch DA, Strand MJ, van Beek EJ, Crapo JD, Silverman EK, Hersh CP, Investigators CO. Asthma Is a Risk Factor for Respiratory Exacerbations Without Increased Rate of Lung Function Decline: Five-Year Follow-up in Adult Smokers From the COPD Gene Study. *Chest* 2018; 153: 368-377.



13. Park HY, Lee SY, Kang D, Cho J, Lee H, Lim SY, Yoon HI, Ra SW, Kim KU, Oh YM, Sin DD, Lee SD, Park YB. Favorable longitudinal change of lung function in patients with asthma-COPD overlap from a COPD cohort. *Respir Res* 2018; 19: 36.
14. Barrecheguren M, Pinto L, Mostafavi-Pour-Manshadi SMY, Tan WC, Li PZ, Aaron SD, Benedetti A, Chapman KR, Walker B, Fitzgerald JM, Hernandez P, Maltais F, Marciniuk DD, O'Donnell DE, Sin DD, Bourbeau J. Identification and definition of asthma–COPD overlap: The CanCOLD study. *Respirology* 2020; 25: 836-849.
